# Supplementary material
Source: publisher figshare collection journal article supplement (https://acs.figshare.com/ndownloader/files/8276609)
Supplement: Supplementary file 1 [file 8276609]

# High-Toughness Polycation Crosslinked Triblock Copolymer Hydrogels

Yaoyao Chen, Kenneth R. Shull\*

*Department of Materials Science and Engineering, Northwestern University, Evanston, IL,  
60208, USA*

E-mail: k-shull@northwestern.edu

## Supporting Information

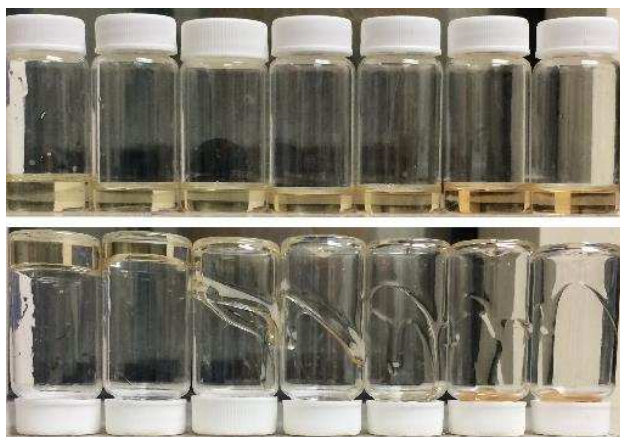

Figure 1: hA/QVP20 samples used in rheological experiments. The sol-gel transition is induced by DMSO/water mixed solvents. From left to right, the water contents are: 30 wt.%, 25 wt.%, 20 wt.%, 15 wt.%, 10 wt.%, 5 wt.%, and 0 wt.%.

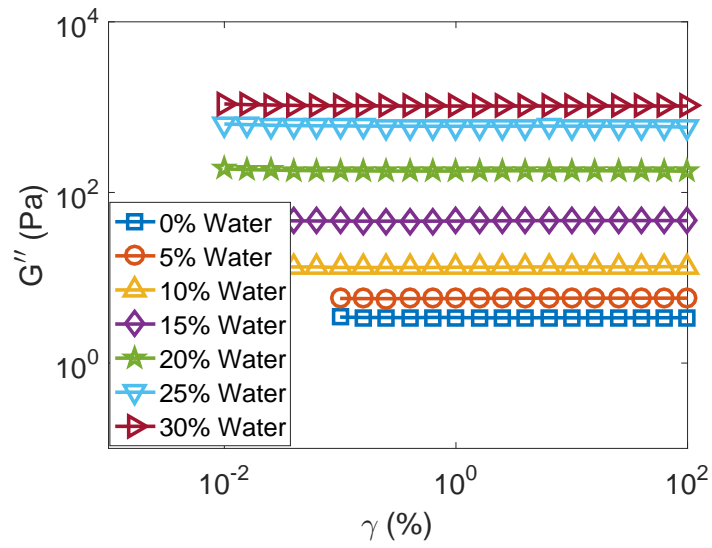

Figure 2: Determination of linear viscoelastic regime in hA/QVP20 system under shear deformation.
